# Supplementary material
Source: publisher site journal article supplement (https://jmir.org/api/download?alt_name=cancer_v10i1e48627_app1.docx&filename=f2905c61-bf0a-11ef-9c02-5fafd338caef.docx)
Supplement: Supplementary file 1 [file download]

**Appendix.** Preregistered mediation analyses

**Effect of social cues on intentions mediated by perceived social presence**

|  | Social presence (M) | | | | Intentions (Y) | | | |
| --- | --- | --- | --- | --- | --- | --- | --- | --- |
|  | Path | Coefficient | *SE* | *p* | Path | Coefficient | *SE* | *p* |
| Social cues (X) | *a* | .03 | .07 | .59 | *c’* | .15 | .08 | .06 |
| Social presence (M) |  | – | – | – | *b* | .69 | .06 | <.001 |
| Constant | *iM* | 3.79 | .05 | <.001 | *iY* | .80 | .23 | <.001 |
|  | *R2* = .00  *F(*1,390) = .29, *P* = .59 | | | | *R2* = .28  *F(2*,389) = 74.40, *P* <.001 | | | |

*Note:* X = predictor, M = mediator, Y = outcome, *SE* = standard error

**Effect of social on forecasted affect mediated by perceived social presence**

|  | Social presence (M) | | | | Forecasted affect (Y) | | | |
| --- | --- | --- | --- | --- | --- | --- | --- | --- |
|  | Path | Coefficient | *SE* | *p* | Path | Coefficient | *SE* | *p* |
| Social cues (X) | *a* | .02 | .07 | .74 | *c’* | .06 | .05 | .23 |
| Social presence (M) |  | – | – | – | *b* | .91 | .03 | <.001 |
| Constant | *iM* | 3.80 | .05 | <.001 | *iY* | .37 | .14 | .01 |
|  | *R2* = .00  *F*(1,394) = .11, *P* = .74 | | | | *R2* = .64  *F(2,393*) = 349.55, *P* <.001 | | | |

*Note:* X = predictor, M = mediator, Y = outcome, *SE* = standard error

**Effect of social on self-efficacy mediated by perceived social presence**

|  | Social presence (M) | | | | Forecasted affect (Y) | | | |
| --- | --- | --- | --- | --- | --- | --- | --- | --- |
|  | Path | Coefficient | *SE* | *p* | Path | Coefficient | *SE* | *p* |
| Social cues (X) | *a* | .00 | .07 | .98 | *c’* | 2.54 | 1.34 | .06 |
| Social presence (M) |  | – | – | – | *b* | 14.98 | 1.01 | <.001 |
| Constant | *iM* | 3.83 | .05 | <.001 | *iY* | 12.10 | 3.99 | .003 |
|  | *R2* = .00  *F*(1,371) = .00, *P* = .98 | | | | *R2* = .38  *F*(2,370) = 111.07, *P* <.001 | | | |

*Note:* X = predictor, M = mediator, Y = outcome, *SE* = standard error
